# Supplementary material
Source: Springer Nature journal article supplement (https://www.springermedizin.de/resource/supplementary/12889_2012_5049_MOESM1_ESM.pdf/9493162)
Supplement: MOESM1 [file 9493162]

**Additional file 1 --- Rotated component matrix obtained from factor analysis**

| S. No | Land-use type                | Factor 1    | Factor 2    | Factor 3    | Factor 4    | Factor 5    | Factor 6    | Factor 7    | Factor 8    | Factor 9    | Factor 10   | Factor 11   | Factor 12   |
|-------|------------------------------|-------------|-------------|-------------|-------------|-------------|-------------|-------------|-------------|-------------|-------------|-------------|-------------|
| 1     | Aquaculture land             | -0.04       | -0.02       | -0.06       | -0.05       | <b>0.79</b> | 0.06        | -0.06       | 0.00        | -0.08       | -0.13       | -0.02       | -0.07       |
| 2     | Build-up village             | -0.20       | 0.11        | -0.18       | 0.05        | -0.28       | <b>0.62</b> | -0.07       | 0.03        | 0.38        | 0.10        | -0.06       | -0.16       |
| 3     | Cemetery                     | -0.23       | -0.04       | 0.05        | 0.12        | -0.03       | -0.13       | 0.22        | 0.02        | -0.03       | -0.21       | <b>0.65</b> | -0.16       |
| 4     | City                         | -0.10       | -0.03       | -0.03       | -0.01       | <b>0.84</b> | -0.17       | 0.02        | -0.05       | 0.07        | 0.27        | -0.05       | 0.04        |
| 5     | Deciduous forest             | 0.28        | -0.04       | <b>0.87</b> | -0.01       | -0.06       | -0.10       | 0.09        | -0.02       | -0.02       | -0.09       | 0.02        | -0.13       |
| 6     | Field crop                   | 0.28        | -0.10       | 0.03        | 0.14        | -0.15       | -0.28       | <b>0.70</b> | -0.06       | -0.16       | -0.22       | -0.06       | -0.22       |
| 7     | Forest plantation            | 0.06        | -0.10       | -0.06       | -0.02       | -0.17       | -0.25       | -0.45       | -0.09       | -0.29       | <b>0.20</b> | -0.18       | -0.17       |
| 8     | Gasoline station/workshop    | -0.01       | 0.00        | -0.01       | 0.17        | -0.04       | -0.05       | -0.04       | <b>0.79</b> | -0.04       | 0.14        | -0.03       | 0.19        |
| 9     | Golf course                  | -0.02       | <b>0.89</b> | -0.01       | -0.02       | -0.03       | -0.03       | -0.01       | -0.02       | -0.02       | -0.01       | 0.00        | 0.03        |
| 10    | Horticulture                 | 0.26        | -0.04       | -0.01       | -0.13       | -0.08       | 0.07        | -0.12       | 0.00        | <b>0.68</b> | -0.05       | 0.13        | -0.02       |
| 11    | Industrial land              | 0.00        | -0.03       | 0.00        | 0.04        | 0.06        | -0.02       | 0.04        | 0.10        | 0.10        | <b>0.81</b> | -0.02       | -0.10       |
| 12    | Institutional land           | -0.09       | -0.12       | -0.05       | 0.07        | -0.08       | <b>0.63</b> | 0.01        | -0.05       | 0.02        | -0.08       | -0.12       | 0.04        |
| 13    | Landfill                     | -0.20       | -0.01       | -0.11       | 0.03        | -0.15       | -0.49       | 0.11        | -0.01       | <b>0.19</b> | 0.03        | -0.16       | -0.18       |
| 14    | Marsh/swamp                  | -0.05       | -0.01       | -0.04       | 0.05        | -0.02       | 0.02        | 0.01        | 0.09        | 0.09        | -0.08       | -0.09       | <b>0.81</b> |
| 15    | Marsh/swamp/rice paddy       | -0.03       | -0.03       | -0.03       | -0.06       | -0.01       | 0.02        | -0.01       | <b>0.86</b> | -0.03       | -0.03       | 0.00        | -0.07       |
| 16    | Mine                         | -0.11       | -0.01       | <b>0.92</b> | 0.00        | -0.04       | -0.01       | -0.06       | -0.03       | -0.04       | 0.05        | -0.01       | 0.06        |
| 17    | Natural water body           | -0.13       | 0.41        | -0.10       | -0.08       | 0.06        | <b>0.56</b> | 0.06        | 0.00        | -0.06       | 0.36        | -0.02       | -0.30       |
| 18    | Orchard                      | <b>0.70</b> | -0.03       | -0.02       | -0.11       | -0.14       | -0.02       | 0.03        | -0.08       | -0.04       | 0.13        | 0.24        | 0.28        |
| 19    | Paddy field                  | -0.56       | 0.00        | -0.29       | -0.17       | -0.23       | -0.04       | -0.43       | -0.16       | -0.10       | -0.08       | 0.12        | <b>0.32</b> |
| 20    | Pasture/farm house           | 0.14        | -0.02       | -0.03       | <b>0.85</b> | -0.02       | -0.09       | 0.01        | -0.09       | -0.08       | -0.14       | 0.27        | -0.11       |
| 21    | Perennial                    | <b>0.74</b> | -0.04       | 0.02        | 0.03        | -0.06       | -0.06       | 0.09        | -0.02       | -0.01       | 0.01        | -0.04       | -0.04       |
| 22    | Perennial/orchard            | 0.22        | -0.01       | -0.04       | 0.02        | -0.04       | 0.02        | -0.16       | -0.04       | 0.04        | 0.11        | <b>0.79</b> | 0.02        |
| 23    | Pit                          | 0.04        | -0.04       | -0.05       | -0.13       | -0.06       | -0.01       | <b>0.70</b> | -0.09       | -0.18       | 0.30        | -0.03       | 0.09        |
| 24    | Rangeland                    | <b>0.60</b> | 0.05        | 0.09        | 0.13        | 0.00        | -0.09       | -0.03       | -0.01       | 0.06        | -0.36       | -0.01       | -0.24       |
| 25    | Recreation area              | 0.01        | <b>0.90</b> | -0.02       | 0.00        | -0.03       | 0.01        | -0.04       | -0.01       | -0.02       | -0.05       | -0.03       | -0.03       |
| 26    | Reservoir                    | -0.05       | -0.01       | 0.03        | <b>0.86</b> | -0.06       | 0.16        | -0.02       | 0.19        | 0.01        | 0.14        | -0.13       | 0.17        |
| 27    | Transportation/communication | -0.18       | -0.04       | -0.03       | 0.05        | 0.05        | -0.07       | -0.04       | -0.08       | <b>0.78</b> | 0.16        | -0.12       | 0.12        |

These numbers in the matrix are the proportion of each variable's variance that can be explained by the factors. The values given in red have high loading. For example, orchard, perennial and rangeland have high loading value in column one, and all are considered in factor 1.
